# Supplementary material for: Repeated stress exposure leads to structural synaptic instability prior to disorganization of hippocampal coding and impairments in learning
Source: PubMed Central journal article supplement (PMC9468341; doi:10.1038/s41398-022-02107-5), 2022-09-12
Supplement: 41398_2022_2107_MOESM1_ESM.pdf [file 41398_2022_2107_MOESM1_ESM.pdf]

# **Repeated stress exposure leads to structural synaptic instability prior to disorganization of hippocampal coding and impairments in learning**

Alireza Chenani<sup>1\*</sup>, Ghabiba Weston<sup>1,2\*</sup>, Alessandro F. Ulivi<sup>1,3</sup>, Tim P. Castello-Waldow<sup>1</sup>, Rosa-Eva Huettl<sup>1</sup>, Alon Chen<sup>1,2,4</sup> and Alessio Attardo<sup>1,2,3</sup>

<sup>1</sup> Max Planck Institute of Psychiatry, 80804, Munich, Germany.

<sup>2</sup> Graduate School of Systemic Neurosciences GSN-LMU, 82152, Munich, Germany.

<sup>3</sup> Leibniz Institute of Neurobiology, 39118 Magdeburg, Germany

<sup>4</sup> Weizmann Institute of Science, 76100, Rehovot, Israel.

\* Equal contribution

Corresponding author:

Alessio Attardo

Leibniz Institute of Neurobiology, 39118 Magdeburg, Germany

Telephone: 0049 391 626393371

E-Mail: [alessio.attardo@lin-magdeburg.de](mailto:alessio.attardo@lin-magdeburg.de)

## SUPPLEMENTARY FIGURES AND CAPTIONS

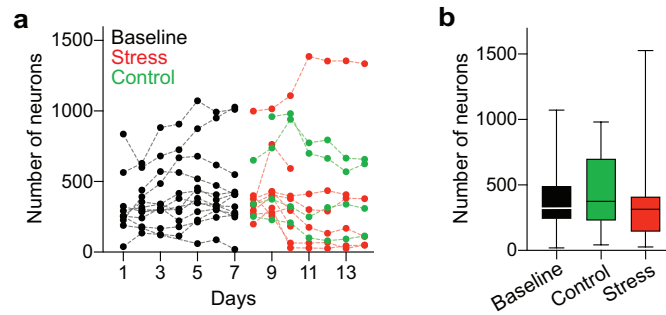

### Supplementary Figure 1 | The number of neurons recorded by WFHM optical imaging is stable.

(a, b) The number of neurons imaged by WFHM microscopy did not change through baseline, control and stress periods ( $p_{B-C} = 0.83$ ,  $p_{B-S} > 0.9999$ ,  $p_{C-S} = 0.27$ ;  $n_B = 106$ ,  $n_C = 35$ ,  $n_S = 60$ ; Kruskal-Wallis test, p values adjusted after Dunn's corrections for multiple comparisons).

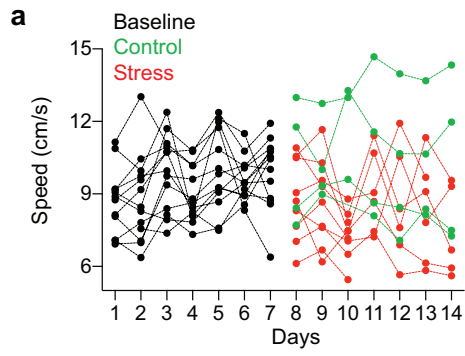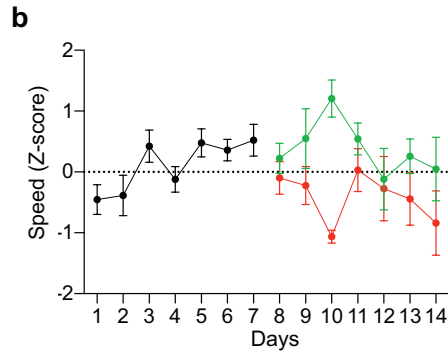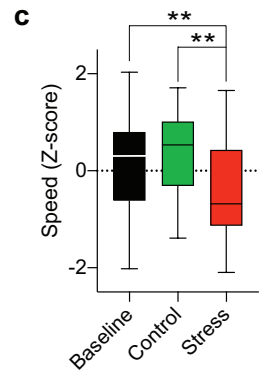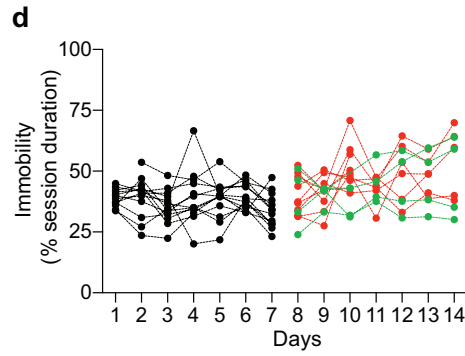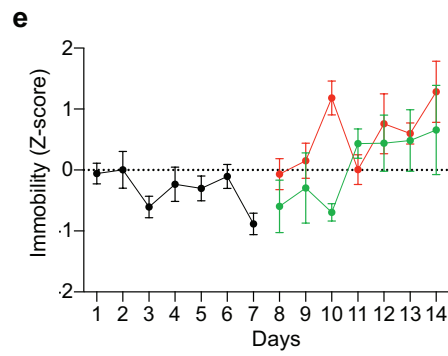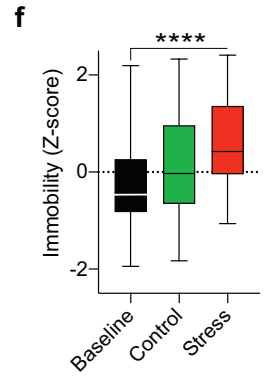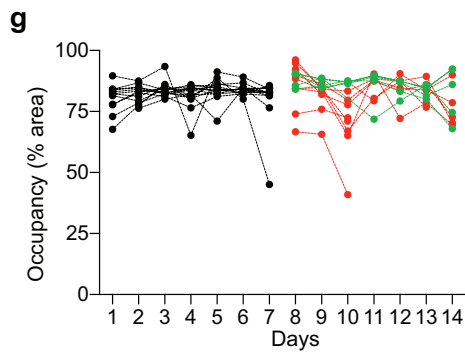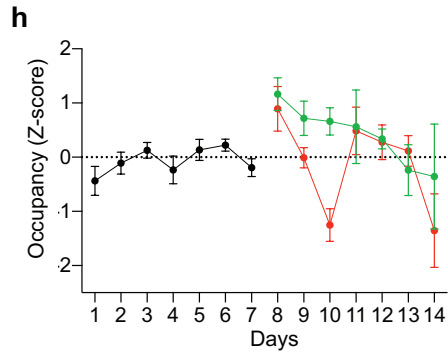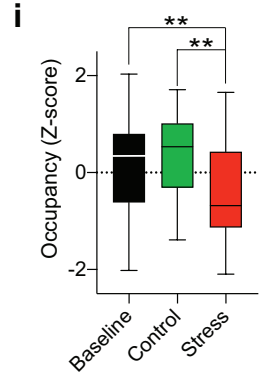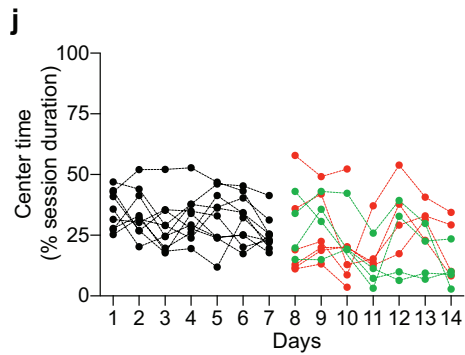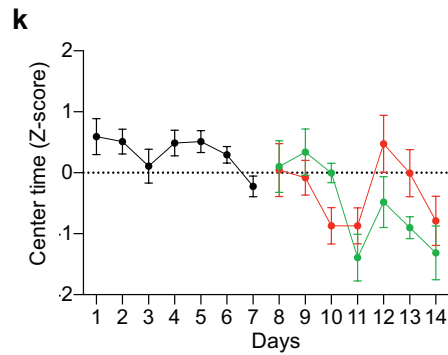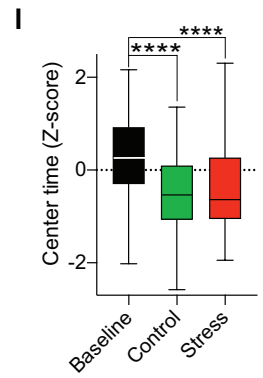

**m**

|               | Activity Rate | Speed | Immobility | Occupancy | Center Time |                         |
|---------------|---------------|-------|------------|-----------|-------------|-------------------------|
| Activity Rate | 1.00          | 0.22  | n.s.       | n.s.      | -0.27       | <b>Baseline</b>         |
| Activity Rate | 1.00          | n.s.  | n.s.       | n.s.      | n.s.        | <b>Control / Stress</b> |

Correlations (Spearman r)

**Supplementary Figure 2 | Repeated stress impairs several aspects of free navigation in a circular arena.**

**(a - c)** Repeated stress decreased average speed during free exploration of the arena ( $p_{B-C} = 0.77$ ,  $p_{B-S} = 0.0048$ ;  $p_{C-S} = 0.0023$ ;  $n_B = 90$ ,  $n_C = 27$ ,  $n_B = 90$ ;  $n_S = 50$ ).

**(d - f)** Repeated stress increased immobility during free exploration of the arena ( $p_{B-C} = 0.20$ ,  $p_{B-S} < 0.0001$ ;  $p_{C-S} = 0.22$ ;  $n_B = 90$ ,  $n_C = 27$ ,  $n_B = 90$ ;  $n_S = 50$ ).

**(g - i)** Repeated stress decreased average occupancy of the arena ( $p_{B-C} = 0.77$ ,  $p_{B-S} = 0.0048$ ;  $p_{C-S} = 0.0023$ ;  $n_B = 90$ ,  $n_C = 27$ ,  $n_B = 90$ ;  $n_S = 50$ ; Kruskal-Wallis test, p values adjusted after Dunn's corrections for multiple comparisons).

**(j - l)** Repeated stress did not affect permanence in the center of the arena ( $p_{B-C} = 0.001$ ,  $p_{B-S} < 0.0001$ ;  $p_{C-S} > 0.999$ ;  $n_B = 90$ ,  $n_C = 27$ ,  $n_B = 90$ ;  $n_S = 43$ )

Kruskal-Wallis test, p values adjusted after Dunn's corrections for multiple comparisons.

**(m)** Spearman correlations between average Activity rates and open field navigation parameters of all groups during the Baseline (top) or Control / Stress (bottom) epochs. n.s.= not significant.

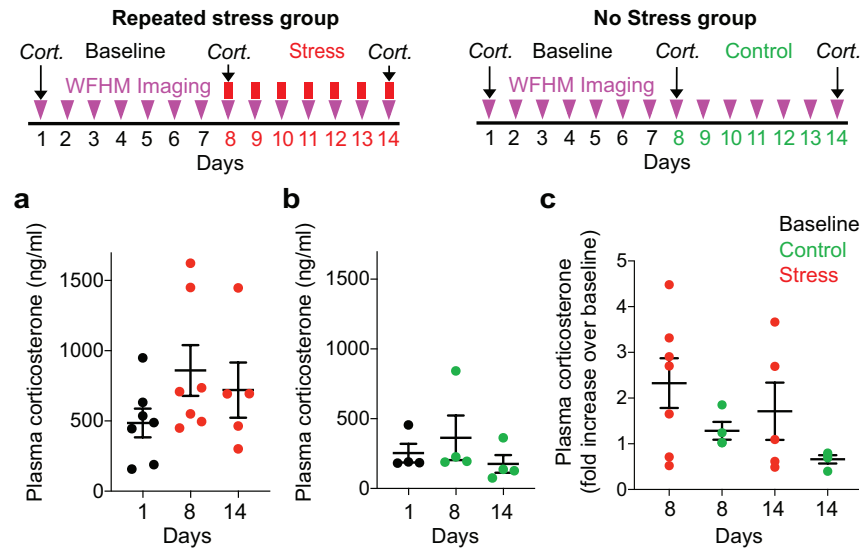

### Supplementary Figure 3 | Blood corticosterone levels in mice imaged with WFHM microscopes upon repeated stress exposures

(a - c) The blood levels of corticosterone did not significantly increase upon repeated stress exposures (a:  $p_{1-8} = 0.12$ ,  $p_{1-14} = 0.70$ ,  $n_1 = 7$ ,  $n_8 = 7$ ,  $n_{14} = 5$ ; b:  $p_{1-8} = 0.31$ ,  $p_{1-14} = 0.31$ ,  $n_1 = 4$ ,  $n_8 = 4$ ,  $n_{14} = 4$ ), although several stressed animals showed a bigger fold increase in the levels of corticosterone in their blood compared to control group (c:  $p_{S-C, 8} > 0.9999$ ,  $p_{S-C, 14} = 0.43$ ;  $n_8 = 11$ ,  $n_{14} = 9$ ; Kruskal-Wallis test, p values adjusted after Dunn's corrections for multiple comparisons).

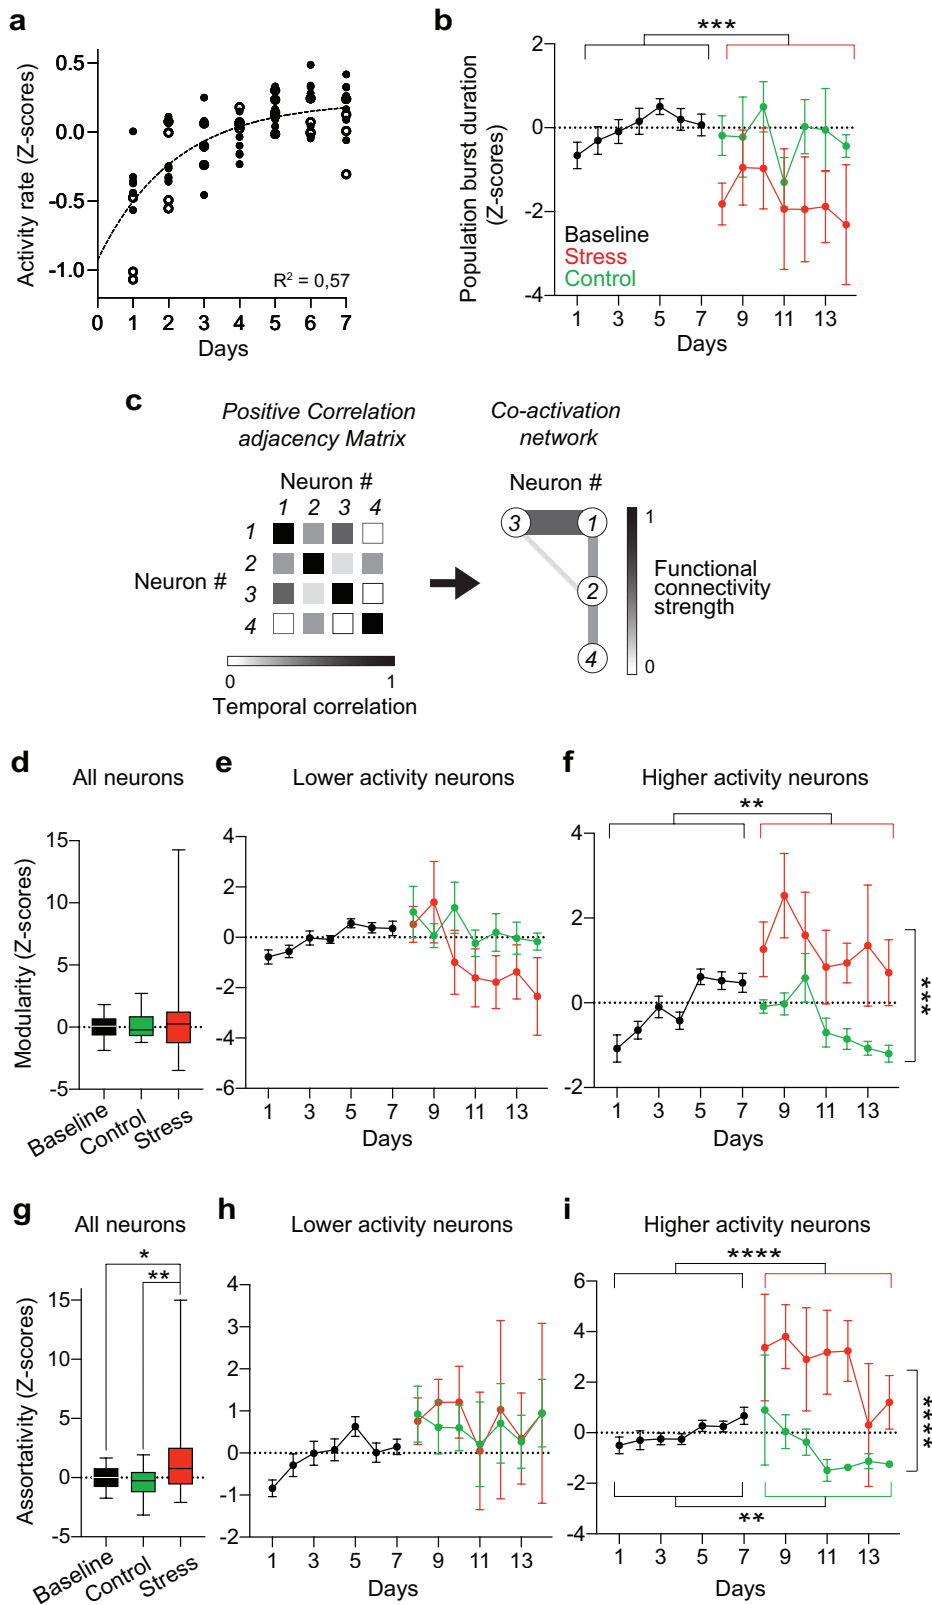

**Supplementary Figure 4 | Exposure to repeated stress affects population burst rate and duration and leads to co-activation networks with more modular and assortative topology**

(a) During baseline activity rates increased in both prospective Control and Stress groups ( $p_{\text{time}} < 0.0001$ ,  $p_{\text{Group}} = 0.067$ ;  $n = 86$ ; Two-way ANOVA) and reached plateau after day 5 (Plateau at  $Y = 0.224$ ; Single exponential fit to all baseline data;  $R^2 = 0.567$ ).

(b) Stress exposure decreased the duration of the population bursts ( $p_{B-C} > 0.99$ ,  $p_{B-S} = 0.0012$ ,  $p_{C-S} = 0.19$ ;  $n_B = 86$ ,  $n_C = 27$ ,  $n_S = 50$ )

(d) Schematic description of the transformation from positive correlation adjacency matrices to co-activity networks.

(e - g) Stress exposure did not affect modularity of networks comprising all neurons (e) and lower activity rate neurons (f) but significantly increased modularity of the network comprising only higher activity neurons (g).

e:  $p_{B-C} > 0.99$ ,  $p_{B-S} > 0.99$ ,  $p_{C-S} > 0.99$ ;  $n_B = 86$ ,  $n_C = 28$ ,  $n_S = 49$ . f:  $p_{B-C} = 0.99$ ,  $p_{B-S} = 0.12$ ,  $p_{C-S} = 0.20$ ;  $n_B = 86$ ,  $n_C = 28$ ,  $n_S = 49$ . g:  $p_{B-C} = 0.14$ ,  $p_{B-S} = 0.009$ ,  $p_{C-S} = 0.0001$ ;  $n_B = 79$ ,  $n_C = 25$ ,  $n_S = 47$ .

(i - j) Stress exposure increased assortativity of the network comprising all neurons (h) mostly due to increased assortativity of the network comprising only higher activity neurons (i, j). h:  $p_{B-C} = 0.65$ ,  $p_{B-S} = 0.022$ ,  $p_{C-S} = 0.005$ ;  $n_B = 86$ ,  $n_C = 85$ ,  $n_S = 49$ . i:  $p_{B-C} = 0.18$ ,  $p_{B-S} = 0.62$ ,  $p_{C-S} > 0.99$ ;  $n_B = 86$ ,  $n_C = 28$ ,  $n_S = 49$ . j:  $p_{B-C} = 0.006$ ,  $p_{B-S} < 0.0001$ ,  $p_{C-S} < 0.0001$ ;  $n_B = 79$ ,  $n_C = 25$ ,  $n_S = 47$ .

(b, d - i), Kruskal-Wallis test, p values adjusted after Dunn's corrections for multiple comparisons.

(b, e, f, h, i), Circles: mean population bursts duration (b) modularity (e, f) or assortativity (h, i) per mouse. Error bars: s.e.m.

(d, g) Box plots: medians and quartiles of the distributions of mean modularity (d) or assortativity (g) per mouse per session.

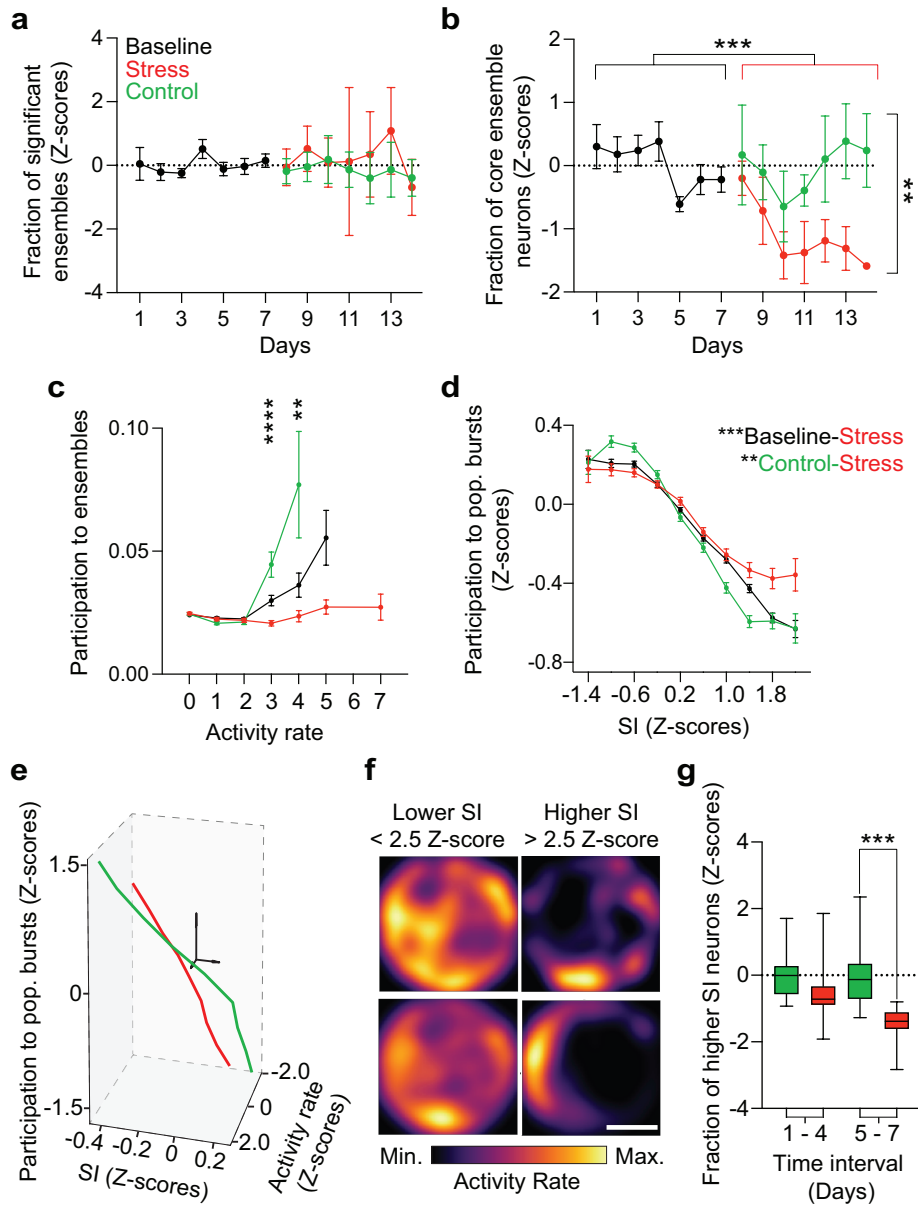

**Supplementary Figure 5 | Exposure to repeated stress affects the temporal structure of activity and spatial coding in dCA1**

(a) Stress exposure did not change the fraction of significant ensembles among all neurons ( $p_{B-C} > 0.99$ ,  $p_{B-S} > 0.99$ ,  $p_{C-S} > 0.99$ ;  $n_B = 84$ ,  $n_C = 28$ ,  $n_S = 45$ ).

(b) Stress exposure decreased the size of ensembles' cores for all neurons ( $p_{B-C} > 0.99$ ,  $p_{B-S} < 0.0001$ ,  $p_{C-S} = 0.0017$ ;  $n_B = 87$ ,  $n_C = 24$ ,  $n_S = 38$ ).

Circles: mean fraction of of significant ensembles per group (a) or core ensemble neurons per group (b). Error bars: s.e.m.

(c) Participation of high activity rate neurons in ensembles' cores increased with time, but stress exposure prevented this increase ( $p_0 = 0.87$ ,  $p_1 = 0.20$ ,  $p_2 = 0.87$ ,  $p_3 < 0.0001$ ;  $p_4 = 0.038$ ;  $n_0 = 14.970$ ,  $n_1 = 9.423$ ,  $n_2 =$



5.193,  $n_3 = 2.326$ ,  $n_4 = 718$ , unpaired t-test, P values corrected for multiple comparisons with Holm-Šidák Method. Circles: mean ensemble participation index binned over activity rates. Error bars: s.e.m.

(d) Stress exposure affected the relationship between SI and the rate of participation in ensembles by decreasing the rate of participation in significant ensembles in neurons with lower SI and increasing the rate of participation in significant ensembles in neurons with higher SI ( $p_{B-C} = 0.49$ ,  $p_{B-S} = 0.0005$ ,  $p_{C-S} < 0.0022$ ;  $n_B = 9575$ ,  $n_C = 25230$ ,  $n_S = 1168$ ; Two-way ANOVA, p values adjusted after Tukey's corrections for multiple comparisons). Circles: mean ensemble participation index binned over activity rates. Error bars: s.e.m.

(e) Stress exposure shifted the state of the dCA1 PNs network in the three-dimensional space defined by activity, SI and participation in ensembles. The arrows in the center represent the axes originating at 0 with the arrows pointing in the positive direction.

(f) Example firing maps of two neurons with lower SI (left) and two neurons with higher SI (right) recorded in the same mouse during the same session. Scale bar, 20 cm.

(g) The difference between control and stress groups became significant after 5 days of repeated stress ( $p_{8-11} = 0.075$ ,  $p_{12-14} = 0.0007$ ;  $n_{C\ 8-11} = 16$ ,  $n_{S\ 8-11} = 20$ ,  $n_{C\ 12-14} = 11$ ,  $n_{S\ 12-14} = 9$ ). Box plots: medians and quartiles of the mean fractions of higher SI neuron distributions per mouse per session. Data in each time interval were normalized to the mean of the control group in that interval.

(a, b, g) Kruskal-Wallis test, p values adjusted after Dunn's corrections for multiple comparisons.

(b, f, g, h, i), Circles: mean population bursts duration (b) modularity (e, f) or assortativity (h, i) per mouse. Error bars: s.e.m.

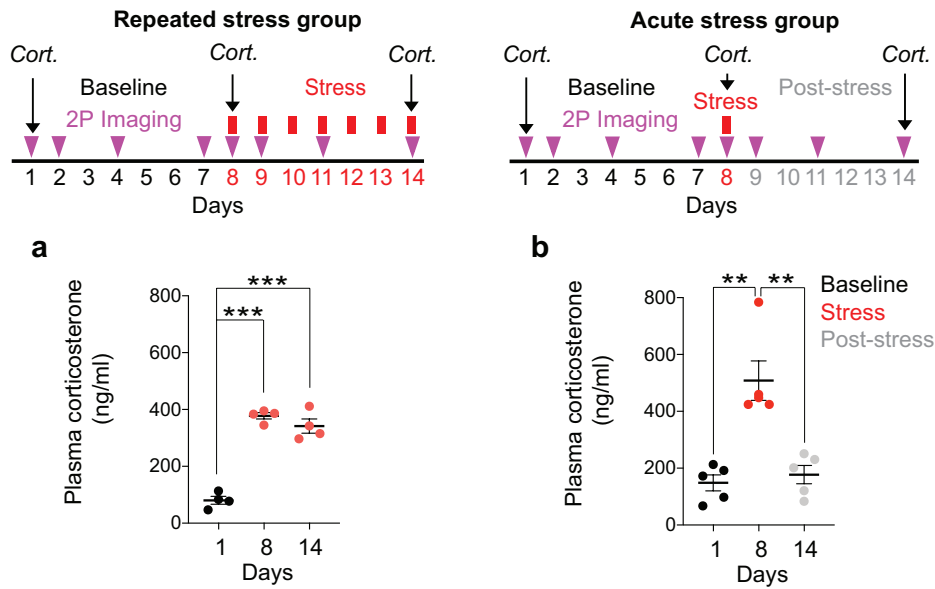

**Supplementary Figure 6 | Repeated and acute stress exposures increase the blood corticosterone levels.**

**(a, b)** The blood levels of corticosterone in the blood of mice undergoing 2P optical imaging significantly increased in the Repeated ( $p_{1-8} = 0.0001$ ,  $p_{1-14} = 0.0007$ ,  $n = 12$ ) and in the acute stress groups ( $p_{1-8} = 0.007$ ,  $p_{8-14} = 0.007$ ,  $n = 10$ ). Repeated Measurements ANOVA, p values adjusted after Sidak's corrections for multiple comparisons).

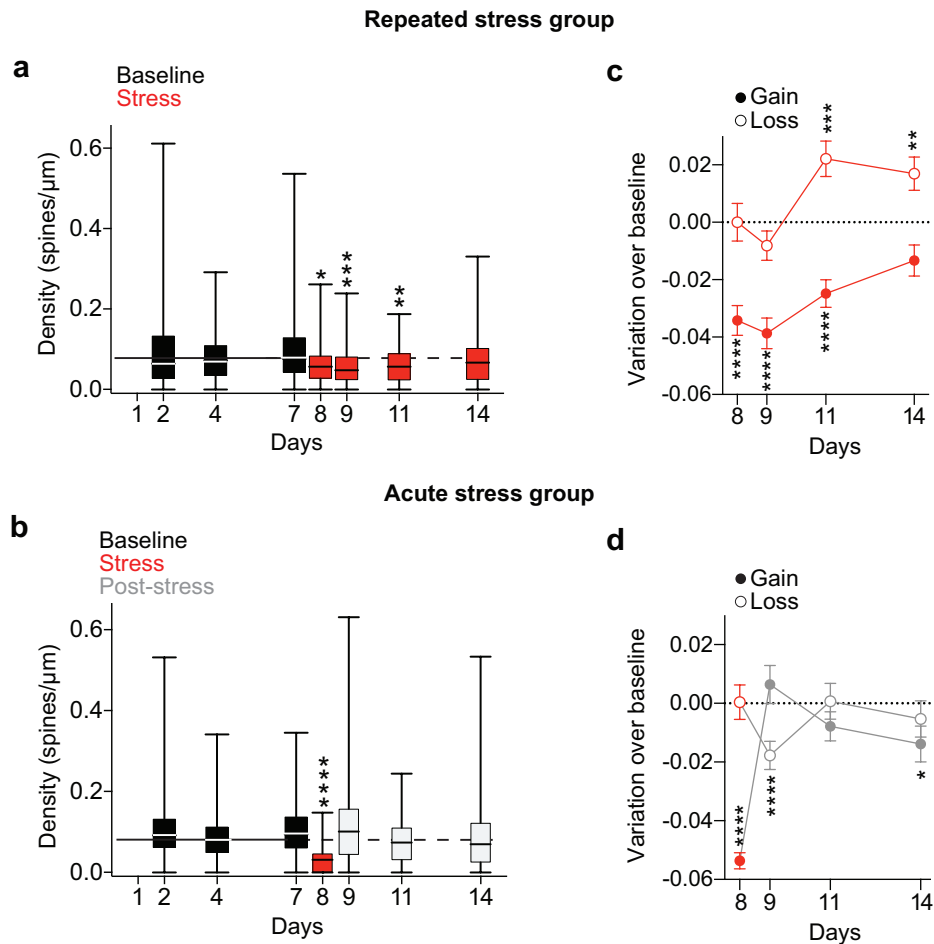

**Supplementary Figure 7 | Stress affects spine dynamics proportionally to its duration**

(a) The density of new spines decreased persistently during repeated stress exposure ( $p_8 = 0.025$ ,  $p_9 = 0.0002$ ,  $p_{11} = 0.0018$ ,  $p_{14} = 0.89$ ,  $n_B = 248$ ,  $n_{8, 9, 11, 14} = 114$ ).

(b) The density of new spines decreased immediately after single stress exposure but recovered after stress interruption ( $p_8 < 0.0001$ ,  $p_9 > 0.999$ ,  $p_{11} = 0.057$ ,  $p_{14} = 0.05$ ,  $n_B = 352$ ,  $n_{8, 9, 11, 14} = 88$ ).

Kruskal-Wallis tests against pooled baseline distribution, p values adjusted after Dunn's correction for multiple comparisons Box plots: medians and quartiles of spine densities distributions per dendrite. Black solid and dashed horizontal lines: mean density of spines during baseline.

(c) Repeated stress exposure initially decreased spine gain but later increased spine loss (gain,  $p_{7-8} < 0.0001$ ,  $p_{8-9} < 0.0001$ ,  $p_{9-11} < 0.0001$ ,  $p_{11-14} = 0.07$ ,  $n = 124$ ; loss,  $p_{7-8} > 0.99$ ,  $p_{8-9} = 0.11$ ,  $p_{9-11} = 0.0005$ ,  $p_{11-14} = 0.0043$ ,  $n = 124$ ).

(d) Acute stress decreased spine gain immediately and later increased spine loss (gain,  $p_{7-8} < 0.0001$ ,  $p_{8-9} = 0.33$ ,  $p_{9-11} = 0.12$ ,  $p_{11-14} = 0.026$ ,  $n = 124$ ; loss,  $p_{7-8} = 0.94$ ,  $p_{8-9} = 0.0004$ ,  $p_{9-11} = 0.91$ ,  $p_{11-14} = 0.39$ ,  $n = 124$ )

One sample t-test against the value 0. Circles: mean variation per dendrites of spine gain (full) or loss (empty) over baseline of the corresponding time window.

**Supplementary Table 1 | Parameter set used in CaImAn**

| Parameter name       | Parameter value | Description                                                    |
|----------------------|-----------------|----------------------------------------------------------------|
| f_rate               | 45 Hz           | movie frame rate                                               |
| min_corr             | 0.8             | minimum correlation of the peak                                |
| min_pnr              | 5               | minimum peak to noise ratio                                    |
| min_SNR              | 1.5             | adaptive way to set threshold on the transient size            |
| r_values_min         | 0.85            | threshold on space consistency                                 |
| decay_time           | 0.4             | decay time of transients/indicator in Seconds                  |
| bord_px              | 15              | pixels considered as border pixels from each side              |
| dims                 | 315, 315        | dimensions of the movie to be processed                        |
| gSig                 | 2               | gaussian width of a 2D gaussian kernel, approximating a neuron |
| gSiz                 | 9               | average diameter of a neuron, in general $4 * gSig + 1$        |
| merge_thresh         | 0.7             | threshold for merging                                          |
| p                    | 2               | order of the autoregressive system                             |
| tsub                 | 10              | Down-sampling factor in time for initialization                |
| ssub                 | 1               | Down-sampling factor in space for initialization               |
| rf                   | 40, 40          | half size of the patch (final patch will be 100x100)           |
| stride               | 20, 20          | overlap among patches                                          |
| gnb                  | -1              | number of background components                                |
| nb_patch             | 8               | number of background components per patch                      |
| method_deconvolution | 'oasis'         | Deconvolution method                                           |
| ssub_B               | 2               | additional down-sampling factor in space for background        |
| ring_size_factor     | 1.5             | radius of the ring                                             |
| del_duplicates       | True            | whether to remove duplicates from initialization               |

**Supplementary Table 2 | Number of neurons analyzed by WFHM imaging per mouse per day.**

**Control group**

| <b>Mouse ID:</b> | <b>1</b> | <b>2</b> | <b>3</b> | <b>4</b> |
|------------------|----------|----------|----------|----------|
| Day 1            | 564      | 227      | 39       |          |
| Day 2            | 629      | 392      | 135      | 439      |
| Day 3            | 883      | 486      | 125      | 571      |
| Day 4            | 907      | 668      | 114      | 564      |
| Day 5            | 1072     | 679      | 227      | 520      |
| Day 6            | 993      | 617      | 299      | 472      |
| Day 7            | 1012     | 549      | 270      | 409      |
| Day 8            |          | 651      | 253      | 341      |
| Day 9            | 960      | 738      | 228      | 375      |
| Day 10           | 981      | 941      | 208      | 323      |
| Day 11           | 700      | 774      | 101      | 250      |
| Day 12           | 664      | 795      | 81       | 317      |
| Day 13           | 570      | 666      | 93       | 340      |
| Day 14           | 625      | 658      | 114      | 310      |

**Repeated Stress Group**

| <b>Mouse ID:</b> | <b>1</b> | <b>2</b> | <b>3</b> | <b>4</b> | <b>5</b> | <b>6</b> | <b>7</b> | <b>8</b> | <b>9</b> |
|------------------|----------|----------|----------|----------|----------|----------|----------|----------|----------|
| Day 1            | 837      | 292      | 324      | 253      | 189      |          |          | 256      | 256      |
| Day 2            | 600      | 316      | 286      | 180      | 171      | 286      | 302      | 242      | 355      |
| Day 3            | 681      | 341      | 294      | 167      | 121      | 305      | 295      | 312      | 339      |
| Day 4            | 725      | 417      | 305      | 179      |          | 380      |          | 221      | 287      |
| Day 5            | 874      | 434      | 454      | 214      | 60       | 350      | 349      | 286      | 381      |
| Day 6            | 951      | 407      | 371      | 246      | 88       | 317      | 331      | 305      | 328      |
| Day 7            | 1028     | 426      | 412      | 262      | 19       | 407      | 280      | 248      | 322      |
| Day 8            | 999      | 401      | 342      | 199      |          | 295      | 269      | 333      | 377      |
| Day 9            | 1016     | 257      | 407      | 312      | 430      | 395      | 279      | 764      | 427      |
| Day 10           | 1109     | 65       | 379      | 31       | 294      | 183      | 317      | 593      | 398      |
| Day 11           | 1386     | 64       | 301      | 29       | 175      |          |          |          | 413      |
| Day 12           | 1354     | 69       | 290      | 27       | 134      |          |          |          | 435      |
| Day 13           | 1356     | 26       | 382      | 46       | 169      |          |          |          | 407      |
| Day 14           | 1335     | 49       | 379      | 49       | 111      |          |          |          |          |
